# Supplementary material
Source: PubMed Central journal article supplement (PMC7450103)
Supplement: supp_RA120.013695_159879_2_supp_550064_qc35mm.pdf [file supp_RA120.013695_159879_2_supp_550064_qc35mm.pdf]

# **Crystal structures of human PAICS reveal substrate and product binding of an emerging cancer target**

Jana Škerlová, Judith Unterlass, Mona Göttmann, Petra Marttila, Evert Homan, Thomas Hellday, Ann-Sofie Jemth, Pål Stenmark

## **Supporting Information**

**Table S1:** List of oligos used to generate PAICS inducible knockdown cell lines.

**Figure S1:** Purity and activity of recombinant human PAICS.

**Figure S2:** Conformational flexibility of the *N*-succinyl moiety of SAICAR.

**Table S1.** List of oligos used to generate PAICS inducible knockdown cell lines.

| Oligos      | Sequence                                                   |
|-------------|------------------------------------------------------------|
| sh2-forward | CCGGGACCAGATTACAGCAGGAAATCTCGAGATTTCTGCTGTAATCTGGTCTTTTTG  |
| sh2-reverse | AATTCAAAAAGACCAGATTACAGCAGGAAATCTCGAGATTTCTGCTGTAATCTGGTC  |
| sh3-forward | CCGGGCTGCTCAGATATTTGGGTTACTCGAGTAACCCAAATATCTGAGCAGCTTTTTG |
| sh3-reverse | AATTCAAAAAGCTGCTCAGATATTTGGGTTACTCGAGTAACCCAAATATCTGAGCAGC |

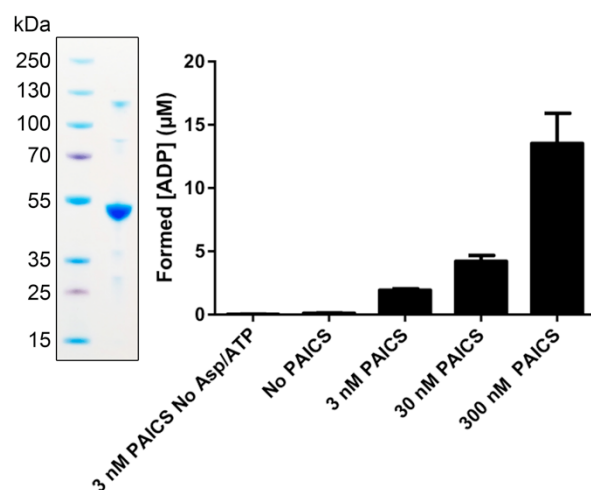

**Figure S1: Purity and activity of recombinant human PAICS.** The purity of the recombinant PAICS used for crystallization experiments is demonstrated here by a Coomassie-stained 4-12% Bis-Tris SDS-PAGE gel with 2  $\mu$ g of PAICS loaded. Activity of PAICS (3, 30 and 300 nM) was tested by detecting ADP formed upon conversion of CAIR to SAICAR requiring ATP and L-aspartate. Graph shows average and stdev of formed [ADP] of duplicate samples.

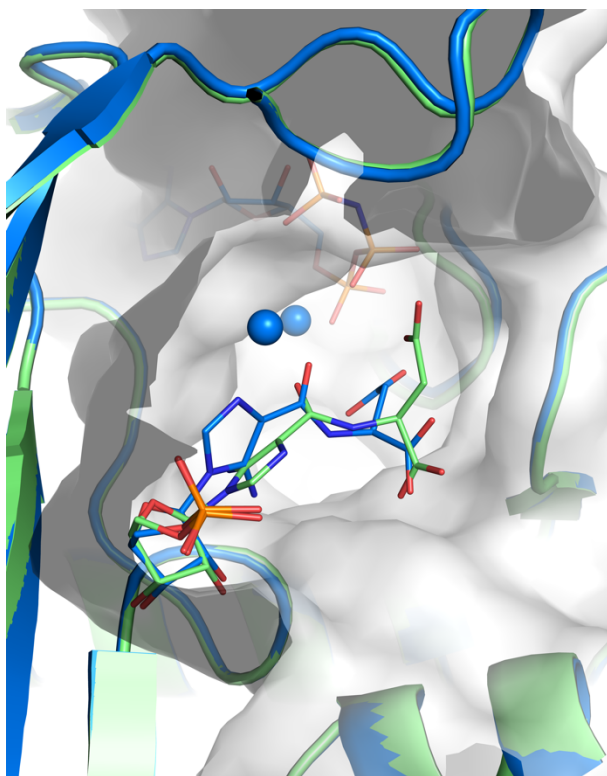

**Figure S2: Conformational flexibility of the *N*-succinyl moiety of SAICAR.** A superposition of the SAICARs sites in the structures of PAICS in complexes with the SAICAR alone (green) and with SAICAR, AMP-PNP, and  $Mg^{2+}$  (blue) is displayed here to demonstrate the flexibility of the *N*-succinyl moiety of SAICAR likely facilitating the exit of the final product SAICAR from the active pocket.
